# Supplementary material for: Attenuating Effects of Dieckol on High-Fat Diet-Induced Nonalcoholic Fatty Liver Disease by Decreasing the NLRP3 Inflammasome and Pyroptosis
Source: MDPI journal article supplement (doi:10.3390/md19060318), 2021-05-30
Supplement: s1 [file s1]

**Table S1. List of primers for qRT-PCR**

| Gene           |         | Primers                       |
|----------------|---------|-------------------------------|
| $\beta$ -actin | Forward | 5'-CCGTAAAGACCTCTATGCCAAC-3'  |
|                | Reverse | 5'-GCAGTAATCTCCTTCTGCATCC-3'  |
| HMGB1          | Forward | 5'-ACAAGCAGCCCTATGAGAAGAA-3'  |
|                | Reverse | 5'-CTGCATCAGGTTTTCTTTAGC-3'   |
| TLR4           | Forward | 5'-ATTGAGAGCCGTTGGTGTATCT-3'  |
|                | Reverse | 5'-TCAAGGACAATGAAGATGATGC-3'  |
| NF- $\kappa$ B | Forward | 5'-AGAACTGACTCTATGCCCCGTGT-3' |
|                | Reverse | 5'-CATCTGTTGAGTTGGAGCTGAC-3'  |
| FASN           | Forward | 5'-CTCTGGTGGTATCCACATCTCA-3'  |
|                | Reverse | 5'-GTGAAAACGAACTTTTCCAAGG-3'  |
| SREBP2         | Forward | 5'-AGGACTTAGTCATGGGGACAGA-3'  |
|                | Reverse | 5'-TGACCTGCTGCAGATATTTGAT-3'  |
| PPAR $\alpha$  | Forward | 5'-GTGTATGAAGCCATCTTCACGA-3'  |
|                | Reverse | 5'-TAAGGAACTCGCGTGTGATAAA-3'  |
| CPT1A          | Forward | 5'-TCTCTGCTGCATGGTAGATGTT-3'  |
|                | Reverse | 5'-GCTCTGCGTTTATGCCTATCTT-3'  |
| PPAR- $\gamma$ | Forward | 5'-TTCGCTGATGCACTGCCTAT-3'    |
|                | Reverse | 5'-GGCATTGTGAGACATCCCCA-3'    |
| FABP4          | Forward | 5'-CGATGAAATCACCGCAGACG-3'    |
|                | Reverse | 5'-ACTCTTGTGGAAGTCACGCC-3'    |
| ATGL           | Forward | 5'-CACGTCACCTGTGCCTTACT-3'    |
|                | Reverse | 5'-ACGGCTGAGCAACTCTAACC-3'    |
| HSL            | Forward | 5'-GGTGACACTCGCAGAAGACA-3'    |
|                | Reverse | 5'-GCATCTCAAAGGCCTCAGGT-3'    |

**Table S2. List of antibodies for immunohistochemistry and immunoblotting.**

| <b>Antigen (host)</b>        | <b>Company</b>              | <b>Dilution rate<br/>(immunohistochemistry)</b> | <b>Dilution rate<br/>(immunoblotting )</b> |
|------------------------------|-----------------------------|-------------------------------------------------|--------------------------------------------|
| ASC (mouse)                  | Santa cruz<br>biotechnology | 1:100                                           |                                            |
| NLRP3 (rabbit)               | Abcam                       | 1:100                                           |                                            |
| HMGB1 (rabbit)               | Abcam                       | 1:1000                                          |                                            |
| TLR4 (mouse)                 | Novus biologicals           | 1:200                                           |                                            |
| NF-κB (rabbit)               | Cell signaling              | 1:500                                           |                                            |
| Caspase1(mouse)              | Santa cruz<br>biotechnology |                                                 | 1:1,000                                    |
| Cleaved caspase1 (rabbit)    | Cell signaling              |                                                 | 1:1,000                                    |
| Gasdermin D (rabbit)         | Cell signaling              |                                                 | 1:1,000                                    |
| Cleaved gasdermin D (rabbit) | Cell signaling              |                                                 | 1:1,000                                    |
| β-actin (rabbit)             | Cell signaling              |                                                 | 1:1,000                                    |
